# Supplementary material for: Prevalence and molecular characterization of multidrug-resistant M. tuberculosis in Jiangxi province, China
Source: PubMed Central journal article supplement (PMC6513856; doi:10.1038/s41598-019-43547-2), 2019-05-13
Supplement: 41598_2019_43547_MOESM1_ESM.pdf [file 41598_2019_43547_MOESM1_ESM.pdf]

# Prevalence and molecular characterization of multidrug resistant *M.tuberculosis* in Jiangxi province, China

Luo dong<sup>1</sup>, Chen qiang<sup>2</sup>, Xiong guangchu<sup>3</sup>, Peng yiping<sup>4</sup>, Liu tao<sup>5</sup>, Chen xiaowen<sup>6</sup>, Zeng lingbing<sup>7</sup>,  
Chen kaisen<sup>8\*</sup>

1. Luo dong. Department of clinical laboratory, the first affiliated hospital of Nanchang university, Nanchang, China; 330006; [luodong1993@foxmail.com](mailto:luodong1993@foxmail.com)
2. Chen qiang. Department of clinical laboratory, the first affiliated hospital of Nanchang 3. university, Nanchang, China; 330006; [sb674389899@qq.com](mailto:sb674389899@qq.com)
3. Xiong guangchu. Department of clinical laboratory, Jiangxi provincial chest hospital, Nanchang, China, 330006; [xionggc100@126.com](mailto:xionggc100@126.com)
4. Peng yiping. Department of clinical laboratory, Jiangxi provincial chest hospital, Nanchang, China, 330006; [pyp74@126.com](mailto:pyp74@126.com)
5. Liu tao. Department of clinical laboratory, the first affiliated hospital of Nanchang university, Nanchang, China; 330006; [304950764@qq.com](mailto:304950764@qq.com)
6. Chen xiaowen. Department of clinical laboratory, the first affiliated hospital of Nanchang university, Nanchang, China; 330006; [13767045805@qq.com](mailto:13767045805@qq.com)
7. Zeng lingbing. Department of clinical laboratory, the first affiliated hospital of Nanchang university, Nanchang, China; 330006; [lingbing\\_zeng@163.com](mailto:lingbing_zeng@163.com)
8. Chen kaisen. Department of clinical laboratory, the first affiliated hospital of Nanchang university, Nanchang, China; 330006; [chenks100@126.com](mailto:chenks100@126.com). (+86) 018970968159; Fax: (+86) 0791 88692594.

\*: Correspondence author: Kaisen Chen, Department of Clinical Laboratory, First Affiliated Hospital of NanChang University, 17 Yongwaizhengjie, Nanchang, 330006, China. Tel: (+86) 18970968159. E-mail: [Chenks100@126.com](mailto:Chenks100@126.com)



Additional table 1 Relation between mutation patterns and clusters or Beijing genotype strains of MDR TB

| Mutation | Clustered | Non-clustered | OR (95% CI)             | P value | Beijing              | Non-Beijing          | OR (95% CI)            | P value |
|----------|-----------|---------------|-------------------------|---------|----------------------|----------------------|------------------------|---------|
|          | No. (%)   | No. (%)       |                         |         | genotypes<br>No. (%) | genotypes<br>No. (%) |                        |         |
| rpoB 531 | 24        | 64            | 1.038<br>(0.579-1.862)  | 0.900   | 76                   | 14                   | 0.642<br>(0.324-1.271) | 0.201   |
| rpoB 526 | 6         | 20            | 1.298<br>(0.489-3.446)  | 0.600   | 20                   | 6                    | 1.046<br>(0.390-2.805) | 0.929   |
| rpoB 516 | 4         | 7             | 0.681<br>(0.190-2.443)  | 0.554   | 11                   | 0                    | Could not<br>calculate | –       |
| rpoB 533 | 3         | 7             | 0.909<br>(0.225-3.672)  | 0.893   | 9                    | 1                    | 0.387<br>(0.047-3.162) | 0.359   |
| rpoB513  | 1         | 3             | 1.168<br>(0.118-11.533) | 0.894   | 4                    | 0                    | Could not<br>calculate | –       |
| Kat315   | 33        | 76            | 0.897<br>(0.524-1.534)  | 0.691   | 90                   | 18                   | 0.689<br>(0.367-1.295) | 0.246   |
| inhA     | 12        | 17            | 0.552<br>(0.244-1.249)  | 0.150   | 24                   | 5                    | 0.726<br>(0.258-2.043) | 0.543   |
| ahpC     | 5         | 14            | 1.090<br>(0.371-3.207)  | 0.875   | 17                   | 4                    | 0.820<br>(0.259-2.596) | 0.736   |

Additional table 2 Allelic diversity of different MIRU-VNTR markers for the whole samples and for the Beijing genotype isolates

| VNTR<br>Alias | Repeats number                                              | Allelic<br>diversity(h) | Repeat number                                 | Allelic<br>diversity(h) |
|---------------|-------------------------------------------------------------|-------------------------|-----------------------------------------------|-------------------------|
|               | All isolates (N=157)                                        |                         | Beijing isolates (N=132)                      |                         |
| Mtub04        | 1(8); 2(38); 3(89); 4(22)                                   | 0.6027                  | 1(5); 2(31); 3(76); 4(20)                     | 0.5935                  |
| ETRC          | 2(2);3(3); 4(152)                                           | 0.0626                  | 2(2); 3(2); 4(128)                            | 0.0597                  |
| ETRD          | 1(3); 2(1); 3(150); 4(3)                                    | 0.0870                  | 1(3); 2(1); 3(126); 4(2)                      | 0.0888                  |
| MIRU40        | 1(3); 2(20); 3(128); 4(3); 5(3)                             | 0.3496                  | 1(1); 2(10); 3(117); 4(2);<br>5(2)            | 0.2097                  |
| MIRU10        | 1(8); 2(26); 3(119); 4(3); 5(1)                             | 0.3976                  | 1(8); 2(13); 3(105); 4(6)                     | 0.3544                  |
| MIRU16        | 1(2); 2(7); 3(126); 4(12)                                   | 0.3498                  | 1(1); 2(5); 3(116); 4(11)                     | 0.2210                  |
| Mtub21        | 2(6); 3(21); 4(119); 5(8); 6(3)                             | 0.4058                  | 2(1); 3(11); 4(113); 5(4);<br>6(3)            | 0.2607                  |
| Qub11b        | 1(4); 2(2); 3(2); 4(134); 5(13);<br>7(2)                    | 0.2652                  | 1(2); 2(1); 3(1); 4(115);<br>5(10); 7(2)      | 0.2364                  |
| ETRA          | 2(3); 3(27); 4(125); 5(1)                                   | 0.3382                  | 2(1); 3(15); 4(115)                           | 0.2297                  |
| Mtub30        | 2(13); 3(1); 4(142)                                         | 0.1761                  | 2(5);3(1); 4(125)                             | 0.1025                  |
| MIRU26        | 1(3); 2(1); 3(1); 4(11); 5(19);<br>6(22); 7(88); 8(9); 9(2) | 0.6468                  | 2(1); 4(7); 5(9); 6(17);<br>7(86); 8(9); 9(2) | 0.5507                  |
| ETRE          | 2(5); 3(8); 4(19); 5(108);<br>6(13); 7(1)                   | 0.5047                  | 2(3); 3(2); 4(18); 5(85);<br>6(8); 7(1)       | 0.5657                  |
| Mtub39        | 3(4); 4(131); 5(14); 6(8)                                   | 0.2944                  | 3(3); 4(112); 5(12); 6(5)                     | 0.2719                  |
| Qub26         | 2(5); 3(4); 4(5);5(89); 6(3);<br>7(1); 8(49)                | 0.5818                  | 2(2); 3(4); 4(4);5(69);<br>6(3); 7(1); 8(49)  | 0.5908                  |
| Qub4156       | 0(1); 2(23); 3(128); 5(2); 7(3)                             | 0.3019                  | 2(12); 3(119); 5(2)                           | 0.1802                  |
| HGDI          |                                                             | 0.9859                  |                                               | 0.9803                  |
